# Supplementary material for: Development of Porous Pt Electrocatalysts for Oxygen Reduction and Evolution Reactions
Source: MDPI journal article supplement (doi:10.3390/molecules25102398), 2020-05-21
Supplement: s1 [file s1]

# Development of Porous Pt Electrocatalysts for Oxygen Reduction and Evolution Reactions

Marika Muto <sup>1</sup>, Mayumi Nagayama <sup>2</sup>, Kazunari Sasaki <sup>1,2,3,4</sup> and Akari Hayashi <sup>1,2,3,4,5,\*</sup>

<sup>1</sup> Department of Hydrogen Energy Systems, Kyushu University, 744 Motooka, Nishi-ku, Fukuoka 819-0395, Japan; mmjb004@gmail.com (M.M.); sasaki@mech.kyushu-u.ac.jp (K.S.)

<sup>2</sup> Coevolutionary Research for Sustainable Communities (COI-C<sup>2</sup>RSC), Kyushu University, 744 Motooka, Nishi-ku, Fukuoka 819-0395, Japan; nagayama.mayumi.630@m.kyushu-u.ac.jp

<sup>3</sup> International Research Center for Hydrogen Energy, Kyushu University, 744 Motooka, Nishi-ku, Fukuoka 819-0395, Japan

<sup>4</sup> NEXT-FC, Kyushu University, 744 Motooka, Nishi-ku, Fukuoka 819-0395, Japan

<sup>5</sup> Q-PIT, Kyushu University, 744 Motooka, Nishi-ku, Fukuoka 819-0395, Japan

\* Correspondence: hayashi.akari.500@m.kyushu-u.ac.jp

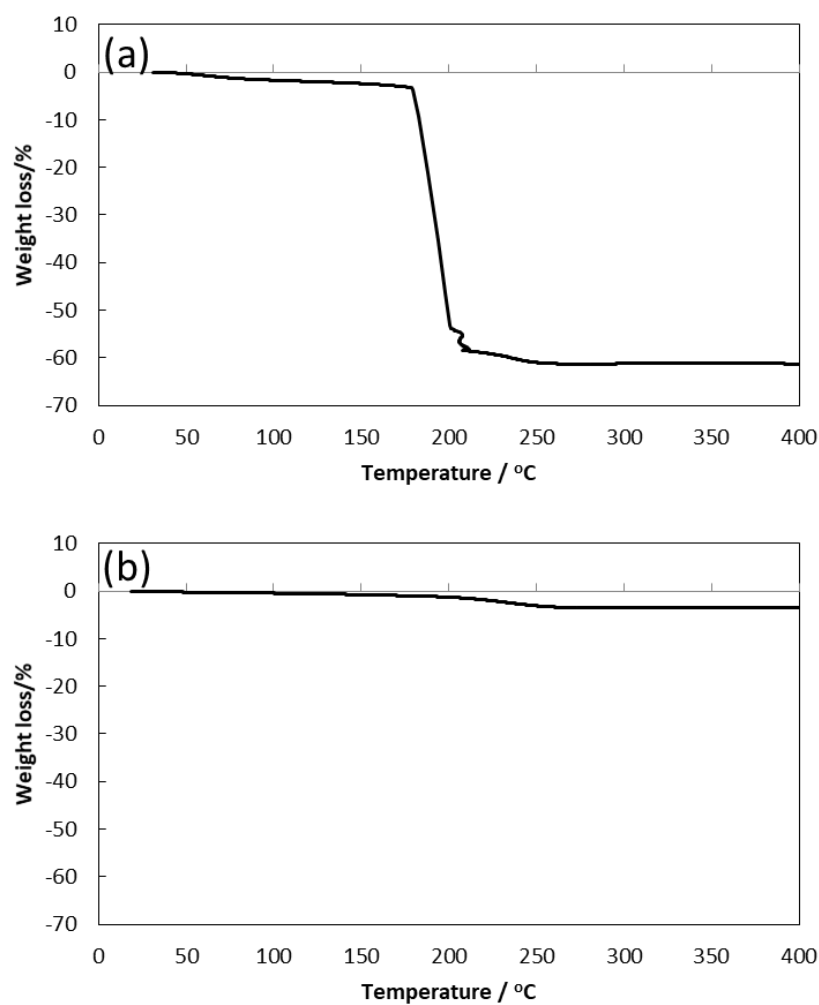

**Figure S1.** Thermogravimetric (TG) analyses of porous Pt **(a)** with heat treatment at 400 °C for 3 hours under dry nitrogen and **(b)** with additional heat treatment at 200 °C for 10 minutes under humidified nitrogen.

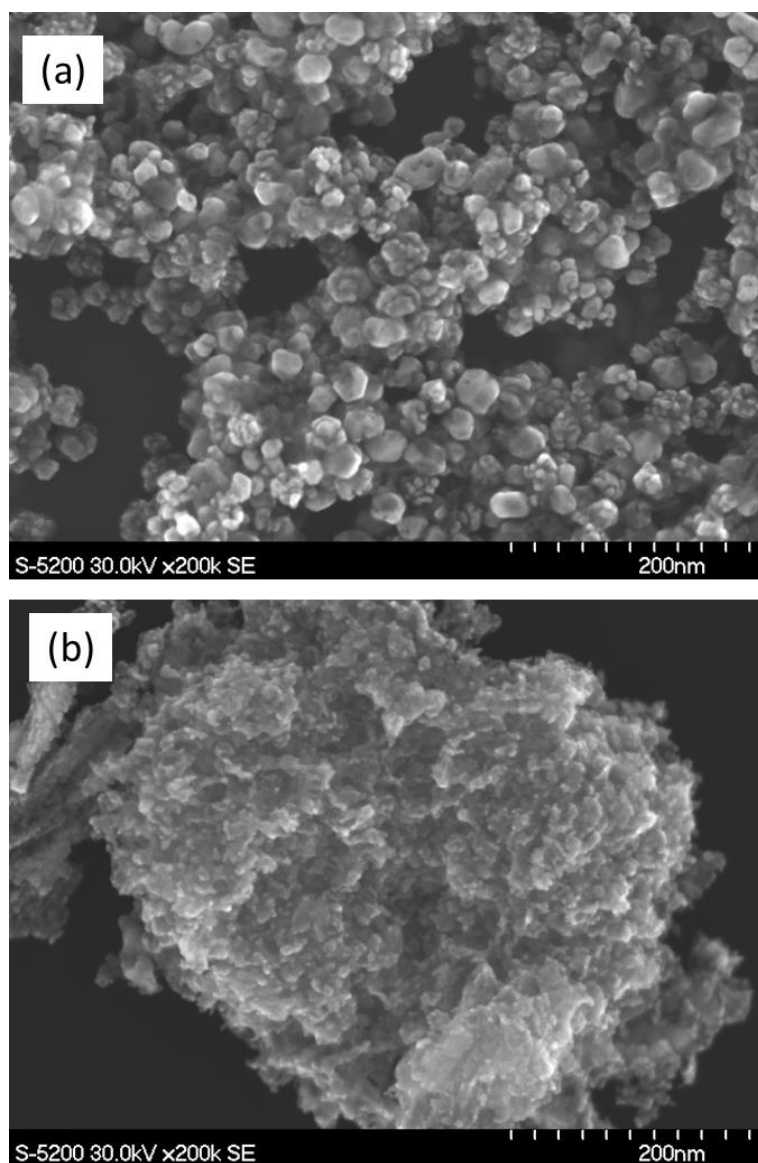

**Figure S2.** SEM images of (a) porous Pt and (b) Pt black with a higher magnification.

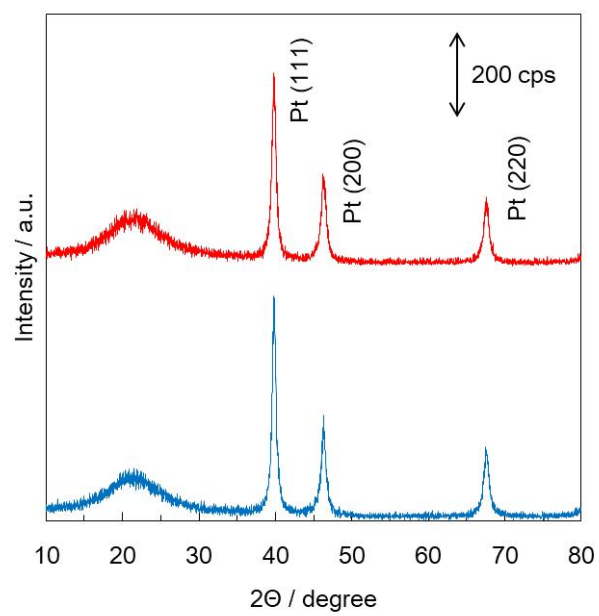

**Figure S3.** XRD patterns of porous Pt (top, red) and Pt black (bottom, blue).

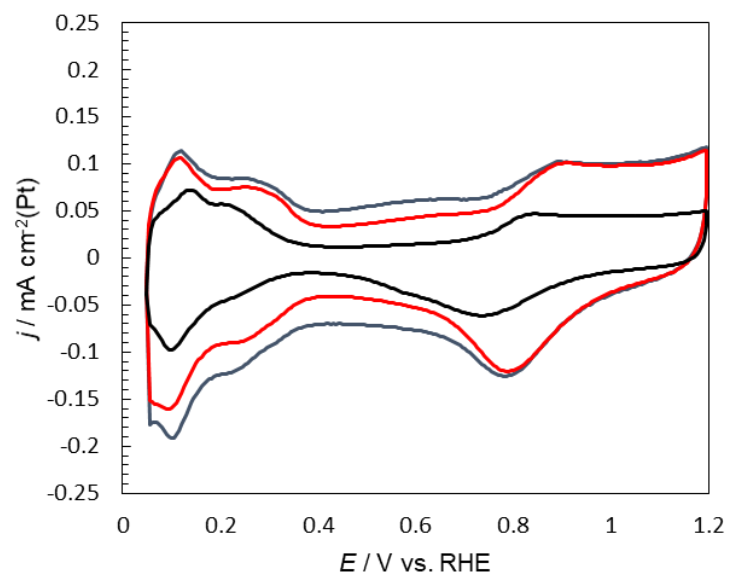

**Figure S4.** Cyclic voltammograms of porous Pt (red), Pt black (blue), and Pt/KB (black), where the current is normalized to specific surface area of Pt.
